# Supplementary material for: A Nationwide Study on the Risk of Autoimmune Diseases in Individuals With a Personal or a Family History of Schizophrenia and Related Psychosis
Source: Atypon-hosted journal article supplement (doi:10.1176/appi.ajp.2013.13010086), 2013-10-16

**Online supplementary Table 1:** Diagnosis codes on the included autoimmune diseases and infections, based on the WHO International Classification of Diseases (ICD) codes from the ICD-8 and ICD-10 periods.

| <b>Autoimmune diseases</b>           | <b>ICD-8</b>           | <b>ICD-10</b>    |
|--------------------------------------|------------------------|------------------|
| Pernicious Anemia                    | 281.0                  | D51.0            |
| Autoimmune Haemolytic Anemia         | 283.90-91              | D59.1            |
| Idiopathic Thrombocytopenic Purpura  | 446.49                 | D69.3            |
| Thyrotoxicosis                       | 242.00                 | E05.0            |
| Autoimmune Thyroiditis               | 245.03                 | E06.3            |
| Type 1 Diabetes                      | 249                    | E10              |
| Primary Adrenocortical Insufficiency | 255.1                  | E27.1            |
| Multiple Sclerosis                   | 340                    | G35              |
| Guillain Barre Syndrome              | 354                    | G61.0            |
| Iridocyclitis                        | 364                    | H20              |
| Crohn's Disease                      | 563.01                 | K50              |
| Ulcerative Colitis                   | 563.19                 | K51              |
| Autoimmune Hepatitis                 | 571.93                 | K73              |
| Primary Biliary Cirrhosis            | 571.90                 | K74.3            |
| Celiac Disease                       | 269.00                 | K90.0            |
| Pemphigus                            | 694.00-04, 694.08-09   | L10              |
| Pemphigoid                           | 694.05                 | L12              |
| Psoriasis vulgaris                   | 696.09-10, 696.19      | L40.0-3, L40.5-9 |
| Alopecia Areata                      | 704.00                 | L63              |
| Vitiligo                             | 709.01                 | L80.9            |
| Seropositive Rheumatoid Arthritis    | 712.19, 712.39, 712.59 | M05-M06          |
| Juvenile Arthritis                   | 712.09                 | M08              |
| Wegener's Granulomatosis             | 446.29                 | M31.3            |
| Dermatopolymyositis                  | 716                    | M33              |
| Polymyalgia Rheumatica               | 446.30-31, 446.39      | M31.5-6, M35.3   |
| Myasthenia Gravis                    | 733.09                 | G70.0            |
| Scleroderma                          | 734.0                  | M34              |
| Systemic Lupus Erythematosus         | 734.19                 | M32.1, M32.9     |
| Sjogren's Syndrome                   | 734.90                 | M35.0            |
| Ankylosing Spondylitis               | 712.49                 | M45.9            |

**Online supplementary Table 1 (continued):** Diagnosis codes on the included autoimmune diseases and infections, based on the WHO International Classification of Diseases (ICD) codes from the ICD-8 and ICD-10 periods.

| Diagnosis                          | ICD-8                                                                                                                                                                                                                                                                                                                                                                                                                                                                                                                                                                                                                                                                                                                                                                                                                                                                                                                                                            | ICD-10                                                                                                                                                                                                                                                                                                                                                                                                                                                                                                                                                                                                                                                                                                                                                                                                                                                                         |
|------------------------------------|------------------------------------------------------------------------------------------------------------------------------------------------------------------------------------------------------------------------------------------------------------------------------------------------------------------------------------------------------------------------------------------------------------------------------------------------------------------------------------------------------------------------------------------------------------------------------------------------------------------------------------------------------------------------------------------------------------------------------------------------------------------------------------------------------------------------------------------------------------------------------------------------------------------------------------------------------------------|--------------------------------------------------------------------------------------------------------------------------------------------------------------------------------------------------------------------------------------------------------------------------------------------------------------------------------------------------------------------------------------------------------------------------------------------------------------------------------------------------------------------------------------------------------------------------------------------------------------------------------------------------------------------------------------------------------------------------------------------------------------------------------------------------------------------------------------------------------------------------------|
| <b>Infectious related diseases</b> | 000-136, 289.40, 320-324, 360-369, 380-384, 390-392, 420-422, 460-486, 501-3, 508.00-508.03, 510, 513, 522.59, 526.49, 527.20-527.22, 528.09-528.39, 529.03, 540, 562.00-562.19, 566-567.0, 567.08, 572.01-572.09, 577.03, 590, 59500-59501, 597.00, 597.03, 599.06-7, 601.00, 601.02, 604.00-604.01, 607.39, 611.00-611.01, 612-614, 616.00-616.03, 620, 622, 629.49, 630-631.39, 635, 640.00, 640.02, 640.09, 640.10, 640.12, 640.20, 640.22, 640.29, 640.90, 640.92, 641.00, 641.02, 641.10, 641.12, 641.20, 641.22, 641.30, 641.32, 641.40, 641.42, 641.50, 641.52, 641.60, 641.62, 641.70, 641.72, 641.90, 641.92, 642.09, 642.29, 643.00, 643.02, 643.80, 643.82, 643.90, 643.92, 644.90, 644.92, 645.00, 645.02, 645.10, 645.12, 645.20, 645.22, 645.30, 645.32, 645.40, 645.42, 645.50, 645.52, 645.60, 645.62, 645.70, 645.72, 645.80, 645.82, 645.90, 645.92, 670, 678.01, 680-686, 710, 720.00-720.31, 732.99, 761.09, 761.29-49, 763, 998.59, 999.39 | A00-B99, D73.3, E06.0, E23.6A, E32.1, G00-09, H00.0, H03.0-H03.1, H05.0-1, H06.1, H10, H13.1, H16.2-3, H19.0-1, H22.0, H32.0, H44.0-1, H60, H62.0-4, H65-7, H70, H75.0, H94.0, I00-02, I30, I32-3, I40.0, I41.0-2, I43.0, I52.1, J00-J22, J32, J34.0, J35.0, J36, J37.0-1, J39.0-1, J40-J42, J85-6, K04.6-7, K05.2, K10.2, K11.2A, K11.3, K12.2, K13.0A, K14.0A, K20.9°, K35, K57.0, K57.2, K57.4, K61, K63.0, K65.0, K67, K75.0, K81.0, K85.9A, K93.0, L00-L08, L30.3, M00-01, M46.3, M49.0-3, M60.0, M63.0-2, M65.0-1, M68.0, M71.0-1, M73.0-1, M86, M90.0-2, N10-2, N15.1, N16.0, N30, N34.0, N39.0, N41.0-2, N43.1, N43.1, N45, N48.1-2, N49, N51.8B, N70-N77, O03.0, O03.5, O04.0, O04.5, O07.0, O07.5, O08.0, O23, O26.4, O35.3, O41.1, O75.3, O85-O86, O91.0-1, O98, P23, P35-9, T79.3, T80.2, T81.4, T82.6-7, T83.5-6, T84.5-7, T85.7, T87.4, T88.0, T89, Z22, Y41.0-3 |

Online supplemental Figure 1. The possible interpretations of the observed associations between schizophrenia and autoimmune diseases

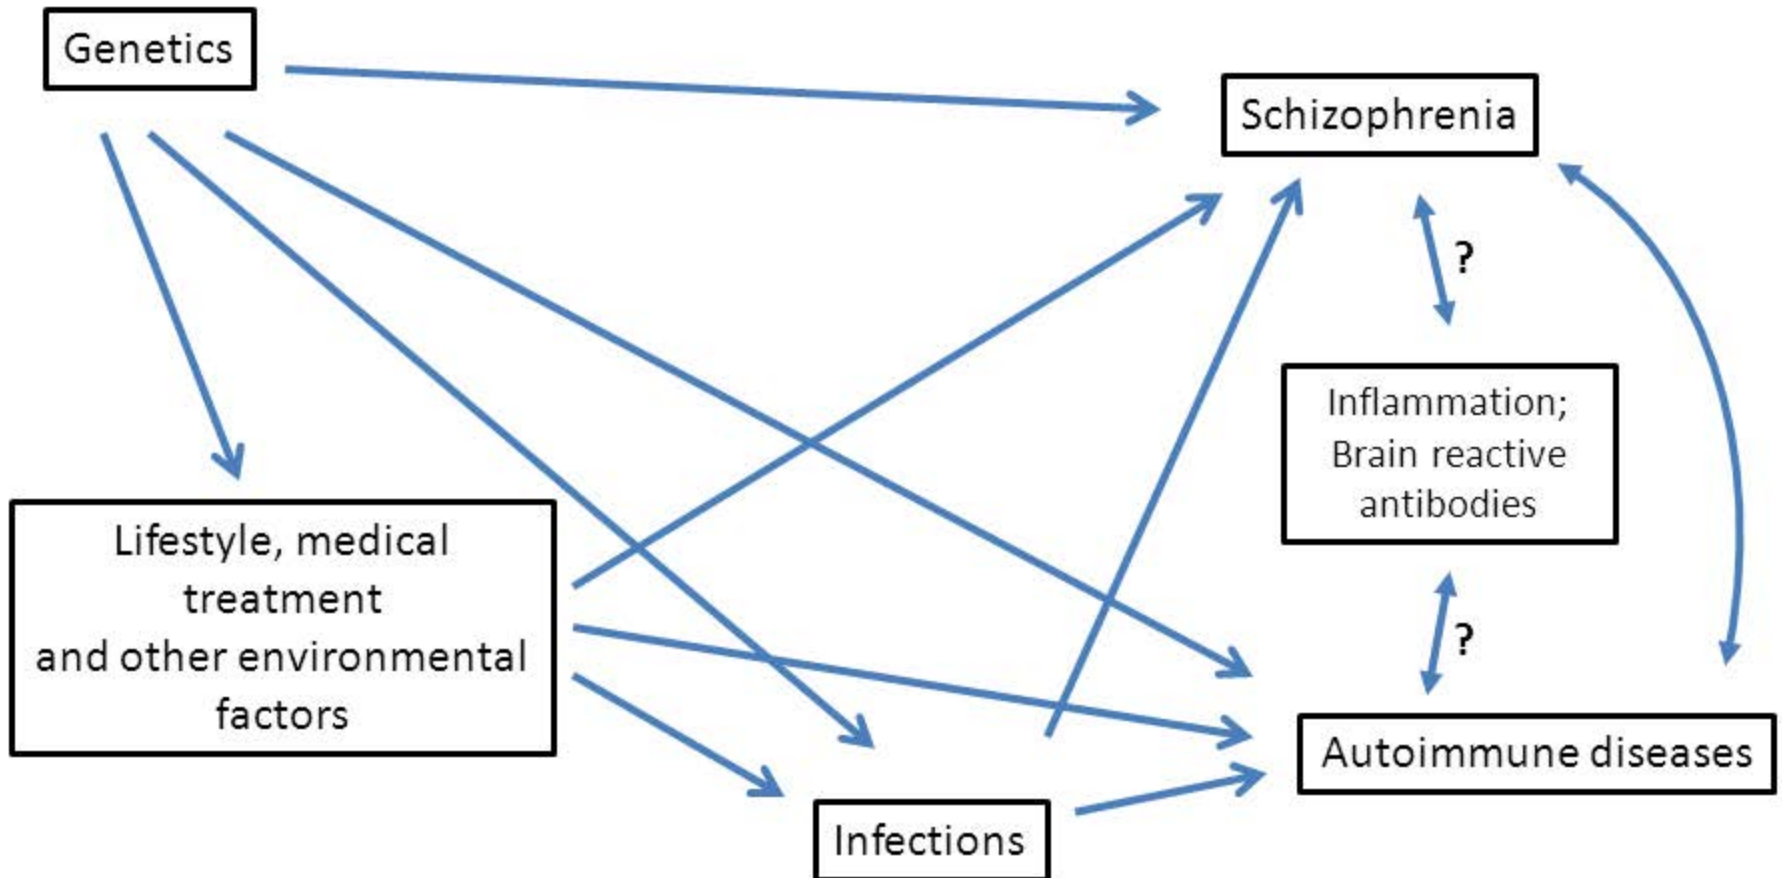

Supplement: 218_ds001.pdf [file 218_ds001.pdf]
